# Supplementary material for: Oncogenic role of PDK4 in human colon cancer cells
Source: PubMed Central journal article supplement — Br J Cancer. 2017 Feb 16;116(7):930–6. doi: 10.1038/bjc.2017.38 (PMC5379150; doi:10.1038/bjc.2017.38), 2017-02-16
Supplement: bjc201738x1.pdf [file bjc201738x1.pdf]

**Figure S1. Evaluation of promoters after transduction of lentiviral particles in LoVo cells.** Fluorescence microscopy of cells transduced with DharmaconSMARTvector 2.0 particles using the DharmaconSMARTchoice Promoter Selection Plate. Images were taken 96 hours after transduction. mCMV promoter showed the strongest signal. TU, transducing units; hCMV, human cytomegalovirus intermediate early promoter; mCMV, mouse cytomegalovirus intermediate early promoter; hEF1, human elongation factor 1 alpha promoter; mEF1, mouse elongation factor 1 alpha promoter; CAG, chicken beta actin hybrid promoter; PGK, mouse phosphoglycerate kinase promoter; UBC, human ubiquitin C promoter.

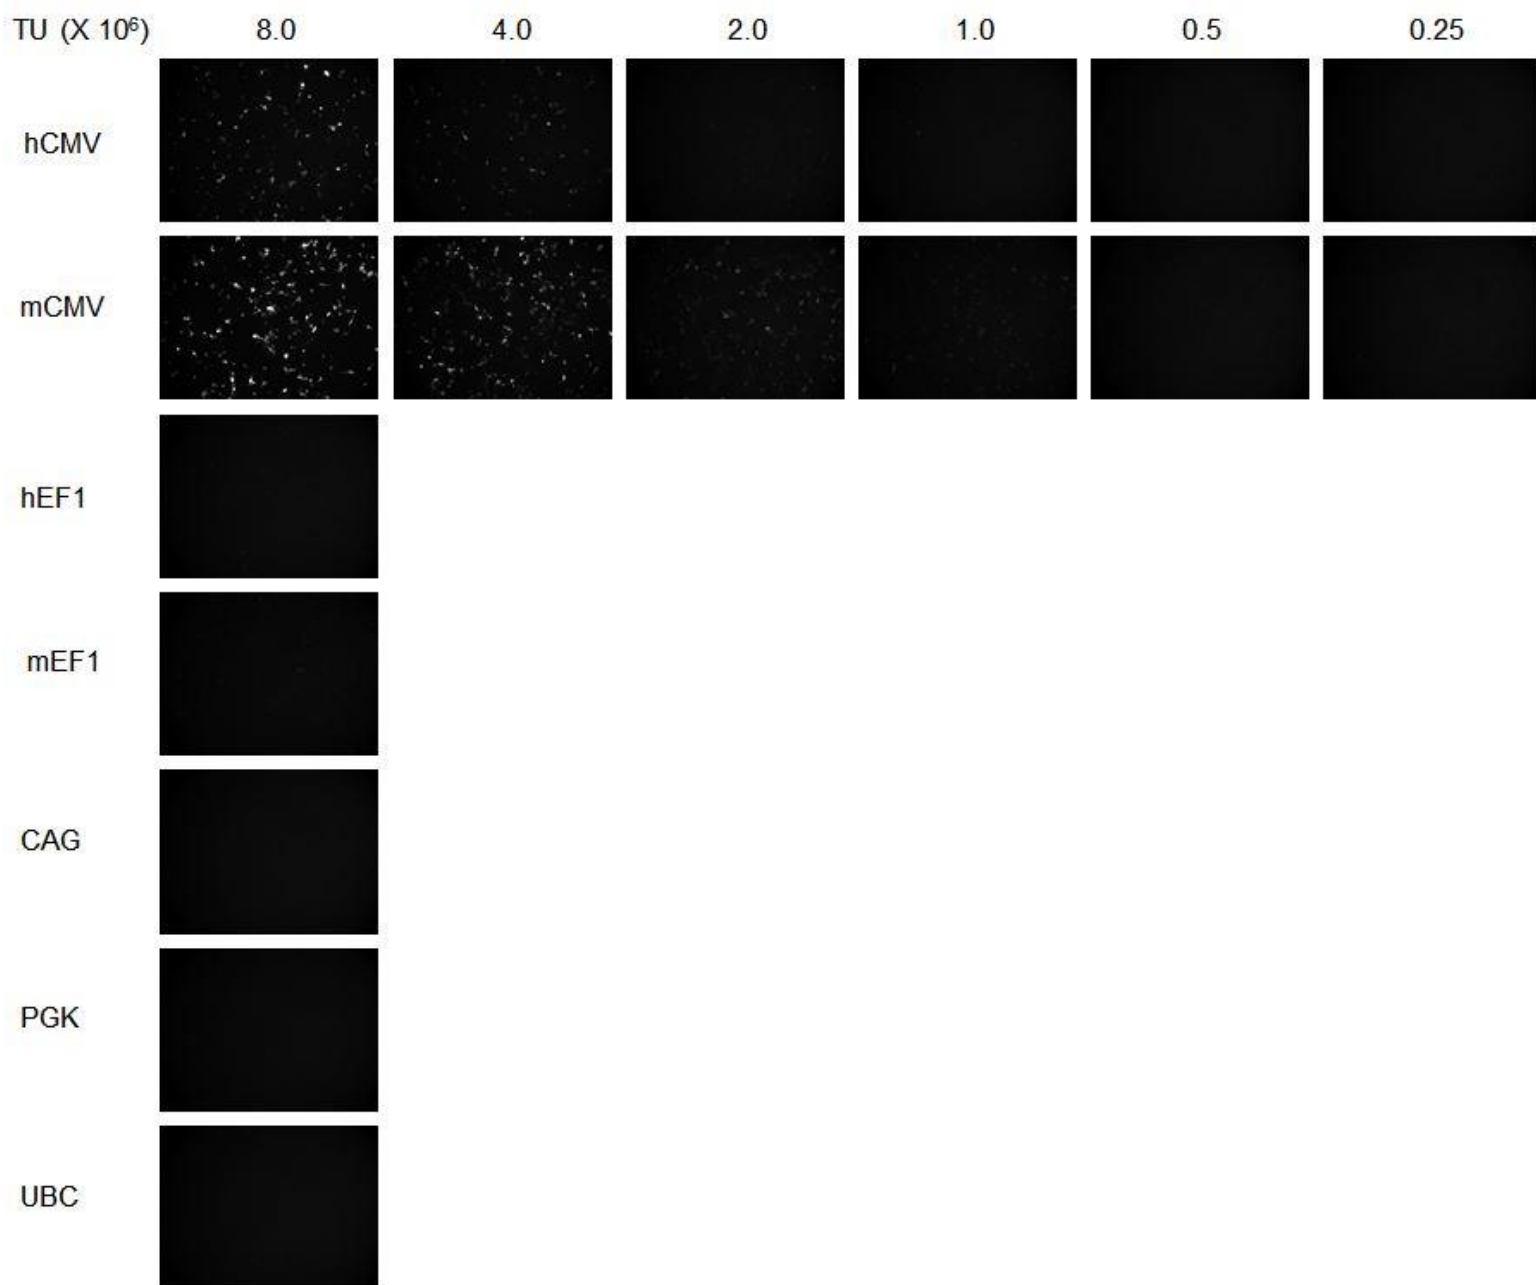

**Table S1**

Oligonucleotide primers for real-time quantitative reverse transcriptase polymerase chain reaction

| Gene           | Oligonucleotide sequences                             | Orientation <sup>1</sup> | Amplicon Size (bp) |
|----------------|-------------------------------------------------------|--------------------------|--------------------|
| <i>HIF1A</i>   | 5'-AGACACAGAAGCAAAGAACCCA<br>5'-CTTTCAGGGCTTGCGGA ACT | (S)<br>(A)               | 150                |
| <i>PDK4</i>    | 5'-AGACAGGAAACCCAAGCCAC<br>5'-GGCATCTTGGACCACTGCTA    | (S)<br>(A)               | 71                 |
| <i>TUBULIN</i> | 5'-TAGATCCACCAGGATGGCACGAG<br>5'-GCAGCTGGACCGCATCTCGT | (S)<br>(A)               | 80                 |
| <i>VEGFA</i>   | 5'-CTTGCCTTGCTGCTCTACCT<br>5'-TCGTGATGATTCTGCCCTCC    | (S)<br>(A)               | 83                 |

<sup>1</sup> A, antisense; S, sense
